# Supplementary material for: Short Hairpin RNA Library-Based Functional Screening Identified Ribosomal Protein L31 That Modulates Prostate Cancer Cell Growth via p53 Pathway
Source: PubMed Central journal article supplement (PMC4186824; doi:10.1371/journal.pone.0108743), 2014-10-06
Supplement: pone.0108743.s001.pdf [file pone.0108743.s001.pdf]

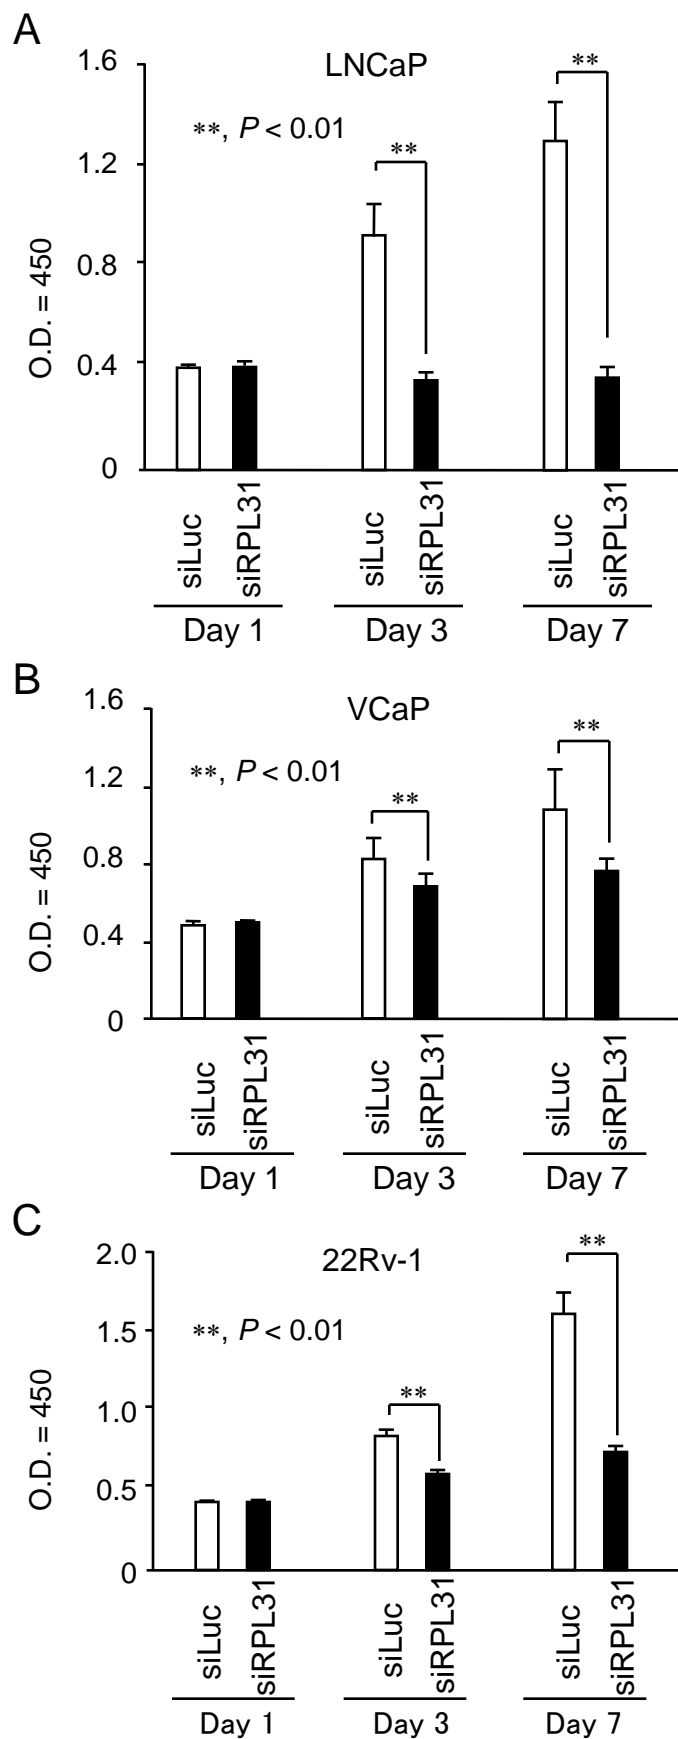

**Figure S1.** Silencing of *RPL31* represses the proliferation of various prostate cancer cells. Cells were transfected with 10 nM siRPL31 and cultured. WST-8 cell proliferation assays were performed at the indicated time points. **(A)** siRPL31 inhibits the growth of LNCaP cells. Data are presented as mean  $\pm$  s.d. ( $n = 4$ ; \*\*,  $P < 0.01$ ). **(B)** siRPL31 inhibits the growth of VCaP cells ( $n = 4$ ). **(C)** siRPL31 inhibits the growth of 22Rv-1 cells ( $n = 4$ ).
