# Supplementary material for: Short Hairpin RNA Library-Based Functional Screening Identified Ribosomal Protein L31 That Modulates Prostate Cancer Cell Growth via p53 Pathway
Source: PubMed Central journal article supplement (PMC4186824; doi:10.1371/journal.pone.0108743), 2014-10-06
Supplement: pone.0108743.s002.pdf [file pone.0108743.s002.pdf]

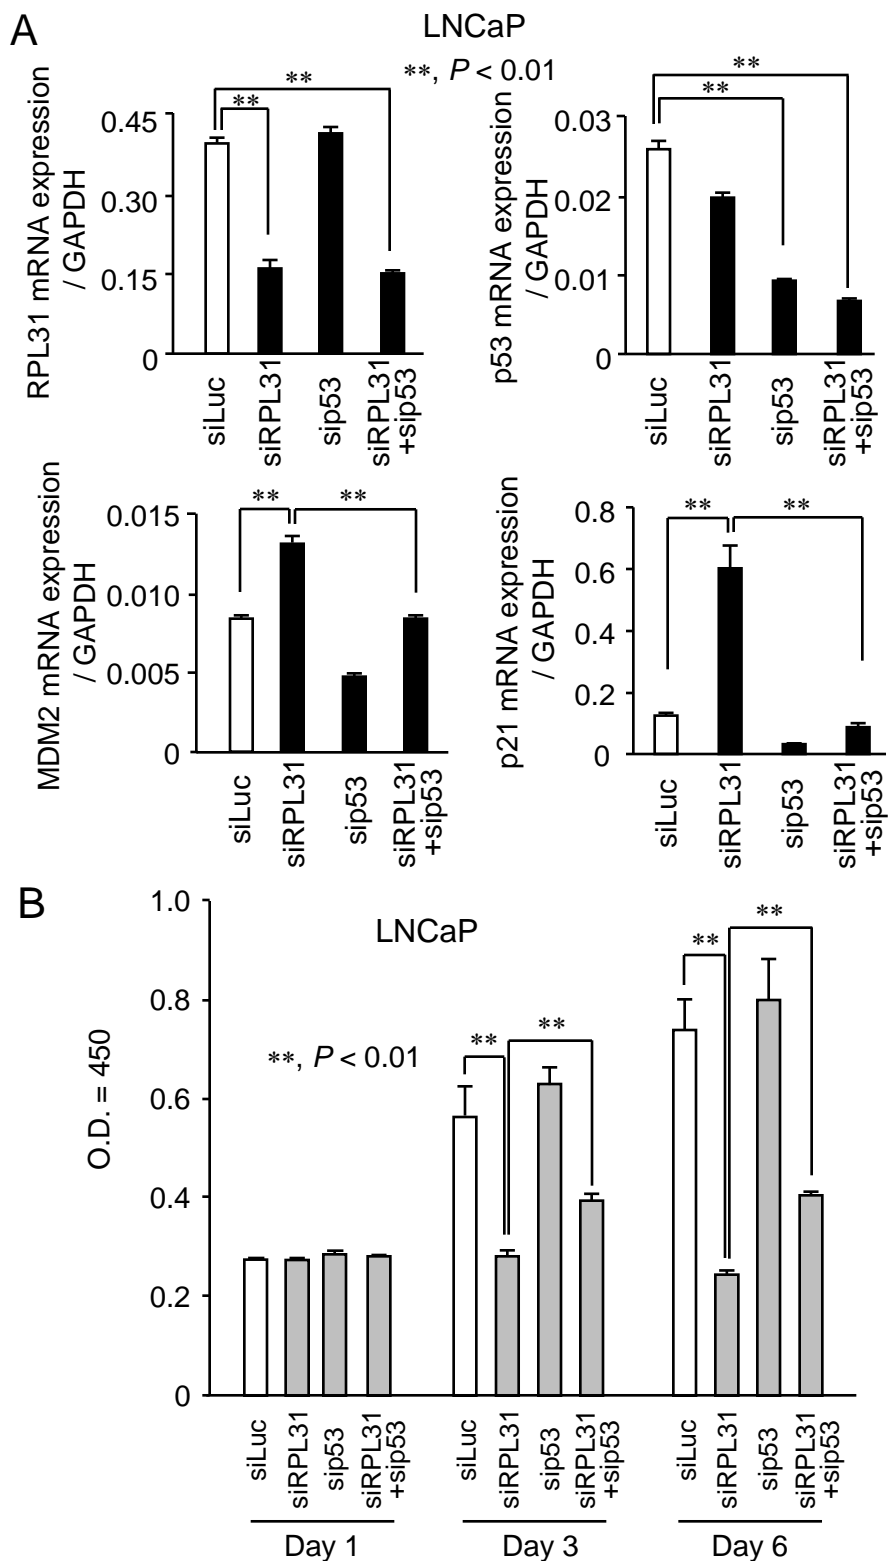

**Figure S2.** Knockdown of *p53* partially recovers the *RPL31* silencing-mediated repression of cell growth and *MDM2* mRNA expression in LNCaP cells. **(A)** Effects of *RPL31* and *p53* knockdown on the expression levels of *RPL31*, *p53*, *MDM2*, and *p21* mRNAs. Cells were transfected with siRPL31, sip53, siRPL31 plus sip53, or siLuc. *RPL31*, *p53*, *MDM2*, and *p21* mRNA levels were analyzed by qRT-PCR, performed in triplicate. mRNA expression was normalized to *GAPDH* and shown as mean  $\pm$  s.d. ( $n = 3$ ; \*\*,  $P < 0.01$ ). **(B)** sip53 partially reversed the repression of cell growth induced by siRPL31. LNCaP cells were transfected with 10 nM each siRPL31, sip53, siRPL31 plus sip53, or siLuc. WST-8 cell proliferation assays were performed at the indicated time points. The absorbance values were measured using a microplate reader at 450 nm. Data are presented as mean  $\pm$  s.d. ( $n = 4$ ; \*\*,  $P < 0.01$ ).
