# Supplementary material for: Short Hairpin RNA Library-Based Functional Screening Identified Ribosomal Protein L31 That Modulates Prostate Cancer Cell Growth via p53 Pathway
Source: PubMed Central journal article supplement (PMC4186824; doi:10.1371/journal.pone.0108743), 2014-10-06
Supplement: pone.0108743.s005.pdf [file pone.0108743.s005.pdf]

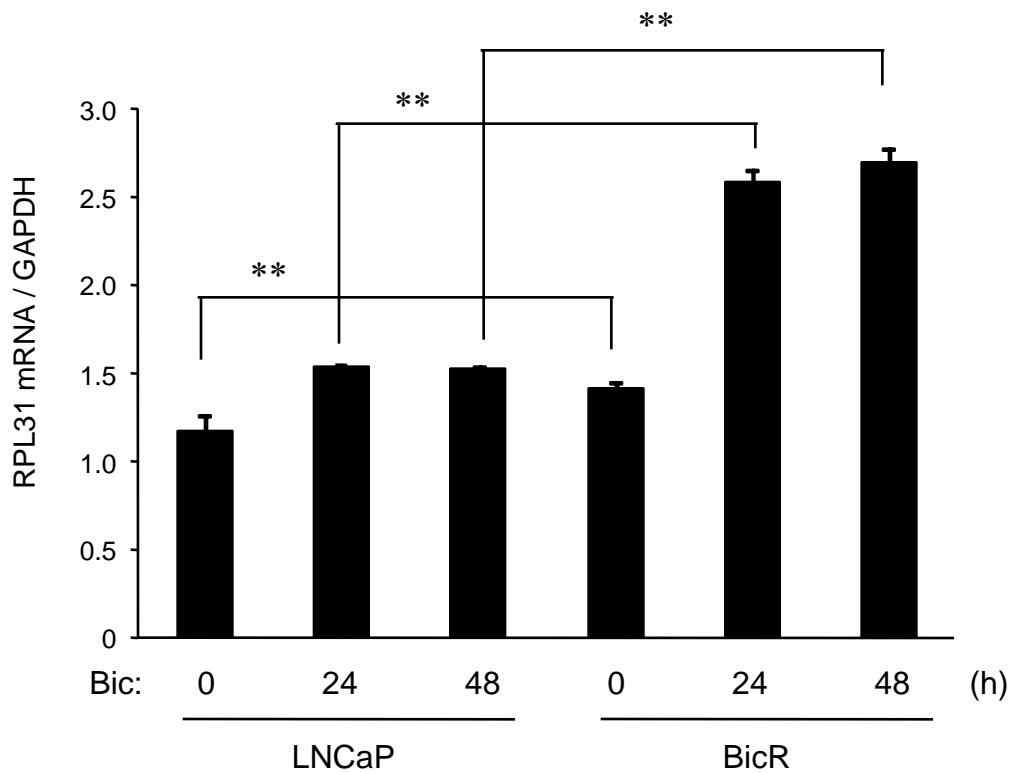

**Figure S5.** Bicalutamide upregulates the *RPL31* mRNA expression. BicR and LNCaP cells were treated with  $10^{-6}$  M bicalutamide (Bic) for the indicated times. *RPL31* mRNA levels were analyzed by qRT-PCR, performed in triplicate. mRNA expression was normalized to *GAPDH* and shown as mean  $\pm$  s.d. ( $n = 3$ ; \*\*,  $P < 0.01$ ).
